# Supplementary material
Source: MDPI journal article supplement (https://www.mdpi.com/2076-3271/10/1/1)
Supplement: s1 [file s1]

## Supporting Information

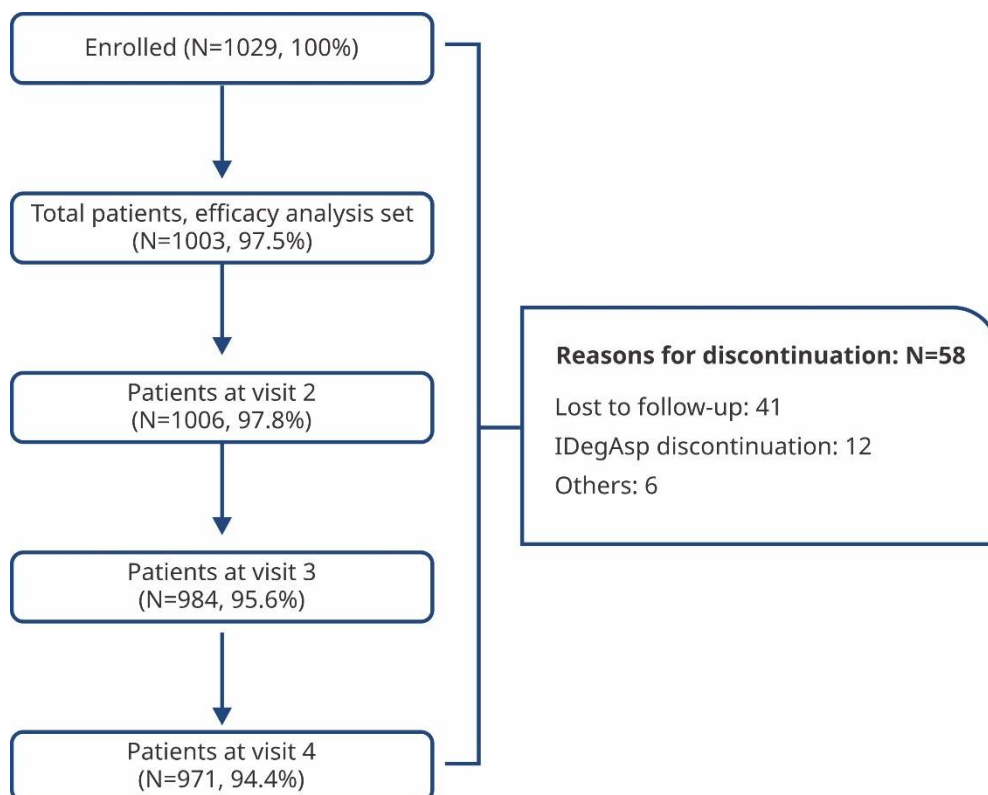

**Figure S1.** Patient disposition. N: Number of patients; IDegAsp: Insulin degludec/Insulin aspart; One patient discontinued for more than one reason

**Table S1.** Other concomitant medications in use reported in ≥5% of patients (safety safety analysis set)

| <b>Concomitant<br/>medications</b> | <b>(N = 1029)<br/>n (%)</b> |
|------------------------------------|-----------------------------|
| Rosuvastatin                       | 238 (23.1%)                 |
| Atorvastatin                       | 228 (22.2%)                 |
| Telmisartan                        | 209 (20.3%)                 |
| Cholecalciferol                    | 124 (12.1%)                 |
| Levothyroxine                      | 115 (11.2%)                 |
| Acetylsalicylic acid               | 91 (8.8%)                   |
| Metoprolol                         | 65 (6.3%)                   |
| Amlodipine                         | 56 (5.4%)                   |
| Ramipril                           | 51 (5.0%)                   |

N: Number of total patients, n: Number of patients in a specified criterion

**Table S2.** Summary of laboratory parameters (safety analysis set)

| Parameters                   | Visit 1 (Baseline)     | Visit 2                 | Visit 3                 | Visit 4                  |
|------------------------------|------------------------|-------------------------|-------------------------|--------------------------|
|                              |                        | (3 months<br>± 2 weeks) | (6 months<br>± 2 weeks) | (12 months<br>± 2 weeks) |
| Total cholesterol<br>(mg/dL) | 173.1 ± 45.9 (498)     | 160.9 ± 36.7<br>(259)   | 156.0 ± 35.0<br>(305)   | 148.0 ± 35.4<br>(364)    |
| HDL-cholesterol<br>(mg/dL)   | 44.6 ± 12.2<br>(480)   | 46.2 ± 11.1 (249)       | 45.6 ± 12.3 (282)       | 47.2 ± 14.1 (354)        |
| LDL-cholesterol<br>(mg/dL)   | 97.9 ± 37.7<br>(478)   | 88.9 ± 31.0 (249)       | 82.5 ± 31.3 (283)       | 77.7 ± 29.8 (353)        |
| Triglycerides<br>(mg/dL)     | 164.2 ± 103.8<br>(494) | 127.2 ± 46.6<br>(252)   | 128.9 ± 48.9<br>(300)   | 119.0 ± 51.0<br>(352)    |

HDL: High-density lipoprotein; LDL: Low-density lipoprotein; n: number of patients in a specified criterion; SD: Standard deviation

Note: Data are presented as mean ± SD (n).

Table S3. Summary of HbA1c, FPG, and PPG values over study duration (efficacy analysis set).

| Parameter   |                | Visit 1            | Visit 2                 | Visit 3                 | Visit 4                  |
|-------------|----------------|--------------------|-------------------------|-------------------------|--------------------------|
|             |                | (Baseline)         | (3 months<br>± 2 weeks) | (6 months<br>± 2 weeks) | (12 months<br>± 2 weeks) |
| HbA1c value |                | 9.5 ± 1.8 (903)    | 8.3 ± 1.3 (629)         | 8.1 ± 1.3 (705)         | 7.7 ± 1.1 (892)          |
| HbA1c by    | OAD            | 9.3 ± 1.7 (678)    | 8.2 ± 1.3 (498)         | 7.9 ± 1.2 (534)         | 7.6 ± 1.0 (650)          |
| previous    |                |                    |                         |                         |                          |
| medication  | Insulin        | 9.9 ± 1.9 (225)    | 8.7 ± 1.2 (131)         | 8.7 ± 1.4 (171)         | 8.1 ± 1.1 (242)          |
| (%)         |                |                    |                         |                         |                          |
| FPG (mg/dL) |                | 180.4 ± 59.7 (792) | 143.7 ± 37.8 (748)      | 134.8 ± 35.2 (768)      | 130.0 ± 33.1 (896)       |
| FPG by      | OAD            | 181.1 ± 56.7 (587) | 144.7 ± 37.9 (560)      | 133.4 ± 32.1 (579)      | 128.6 ± 32.4 (659)       |
| previous    |                |                    |                         |                         |                          |
| medication  | Insulin        | 178.3 ± 67.6 (205) | 140.7 ± 37.5 (188)      | 139.2 ± 43.0 (189)      | 133.9 ± 34.6 (237)       |
| (mg/dL)     |                |                    |                         |                         |                          |
| PPG         | Post-breakfast | 266.9 ± 77.8 (476) | 212.7 ± 54.8 (461)      | 199.0 ± 51.7 (468)      | 184.4 ± 47.2 (515)       |
|             | Post-lunch     | 254.8 ± 84.0 (175) | 182.3 ± 46.6 (161)      | 187.7 ± 49.2 (175)      | 180.6 ± 40.1 (253)       |
|             | Post-dinner    | 216.3 ± 58.0 (3)   | 160.0 ± 28.6 (17)       | 192.3 ± 32.6 (12)       | 164.9 ± 36.2 (10)        |
| PPG by      | Post-breakfast | 277.7 ± 73.6 (309) | 211.6 ± 56.6 (298)      | 196.8 ± 48.7 (301)      | 183.8 ± 47.5 (348)       |
| previous    |                |                    |                         |                         |                          |
| medication  | Post-lunch     | 257.6 ± 86.6 (147) | 187.8 ± 47.1 (122)      | 188.5 ± 52.1 (138)      | 179.6 ± 38.5 (178)       |

|                                  |                    |                    |                    |                    |                    |
|----------------------------------|--------------------|--------------------|--------------------|--------------------|--------------------|
| (OAD)<br>(mg/dL)                 | Post-dinner        | 200.0 (1)          | 169.5 ± 17.0 (4)   | 170.7 ± 2.3 (3)    | 141.8 ± 4.2 (4)    |
|                                  |                    |                    |                    |                    |                    |
| PPG by<br>previous<br>medication | Post-<br>breakfast | 247.0 ± 81.5 (167) | 214.6 ± 51.4 (163) | 203.0 ± 56.8 (167) | 185.6 ± 46.7 (167) |
|                                  | Post-lunch         | 240.1 ± 68.4 (28)  | 165.1 ± 40.7 (39)  | 184.9 ± 37.0 (37)  | 182.7 ± 43.9 (75)  |
| (insulin)<br>(mg/dL)             | Post-dinner        | 224.5 ± 79.6 (2)   | 157.1 ± 31.2 (13)  | 199.4 ± 35.0 (9)   | 180.3 ± 40.4 (6)   |

FPG: Fasting plasma glucose; HbA1c: Glycosylated hemoglobin; n: Number of patients in a specified criterion; OAD:

Oral antidiabetic drug, PPG: Post-prandial plasma glucose; SD: Standard deviation

Note: Data are presented as mean ± SD (n).
